# Supplementary material
Source: Springer Nature journal article supplement (https://www.springermedizin.de/resource/supplementary/12935_2011_295_MOESM3_ESM.pdf/9540244)
Supplement: MOESM3 [file 9540244]

The colors scale:

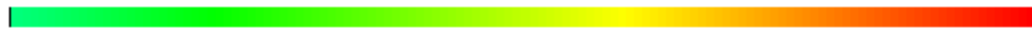

Min = 0.00

20.27

Max = 40.53

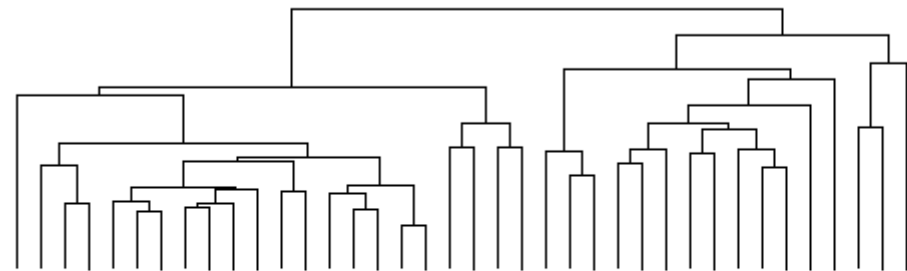

13N 16N 6M 12N 15N 2N 10N 14N 19N 7N 17N 3N 8N 4N 5N 1N 9N 6N 18N 8M 20M 20N 10M 12M 17M 19M 16M 1M 14M 18M 9M 5M 15M 13M 2M 3M 4M

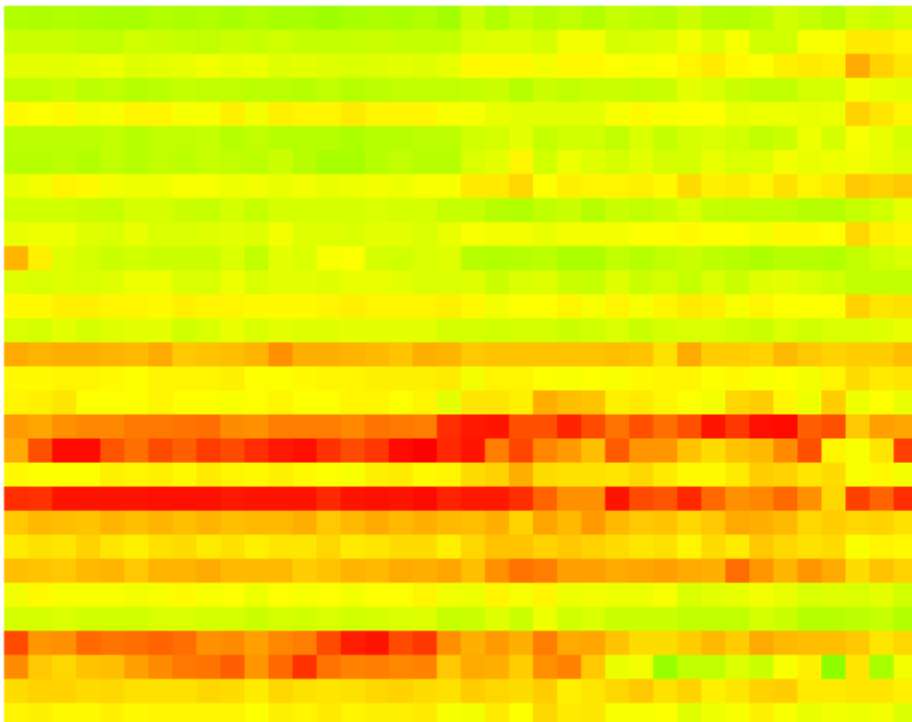

MIR24  
MIR26A  
MIR27B  
MIR30B  
MIR93  
MIR100  
MIR143  
MIR152  
MIR191  
MIR195  
MIR200C  
MIR342-3P  
MIR345  
MIR484  
MIR501-5P  
MIR744  
MIR126\*  
MIR221\*  
MIR101\*  
MIR145\*  
MIR200C\*  
MIR425\*  
MIR34A\*  
MIR29A\*  
MIR30E  
MIR30A  
MIR622  
MIR519B-3P  
MIR497  
MIR30D
